# Supplementary material for: Photocatalytic anti-bioadhesion and bacterial deactivation on nanostructured iron oxide films
Source: Royal Society of Chemistry journal article supplement (doi:10.1039/c7tb03242k), 2018-01-01
Supplement: c7tb03242k1.pdf [file c7tb03242k1.pdf]

## **Supporting Information**

### **Photocatalytic anti-bioadhesion and bacterial deactivation on nanostructured iron oxide films**

Yuan Li, Y. Frank Cheng\*

Department of Mechanical & Manufacturing Engineering, University of Calgary, Calgary,  
Alberta, T2N 1N4, Canada.

\*Corresponding author: [fcheng@ucalgary.ca](mailto:fcheng@ucalgary.ca)

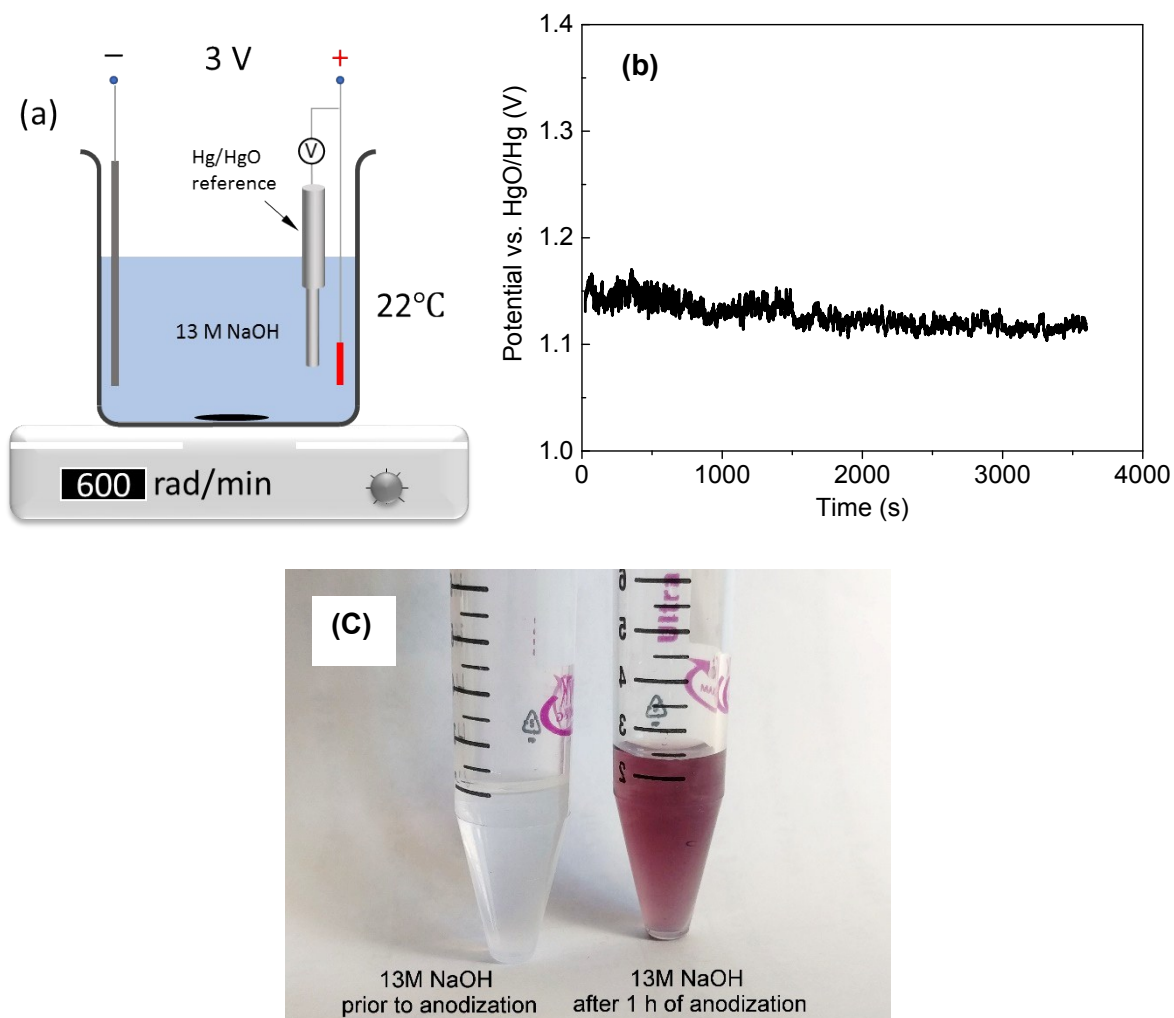

Fig. S1 (a) Schematic setup for anodization of steel electrode. (b) Time dependence of electrochemical potential vs. Hg/HgO reference measured on electrode when anodized in 13 M NaOH solution at 3 V for 60 min. (c) Digital photos of the electrolyte prior to anodization and after 1 h of anodization.

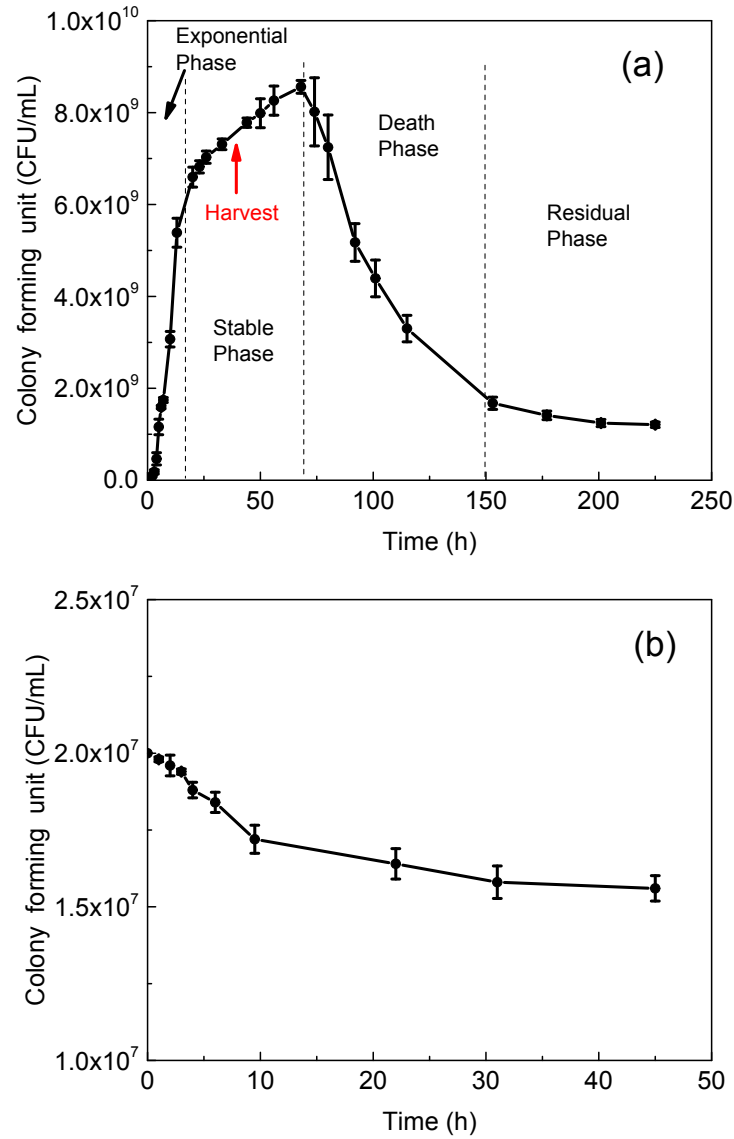

Fig. S2 The growth curve of *pseudomonas aeruginosa* bacteria in (a) LB medium and (b) PBS, where the red arrow indicates the bacteria harvested at 40 h with a concentration of  $7.5 \times 10^9$  CFU/mL.

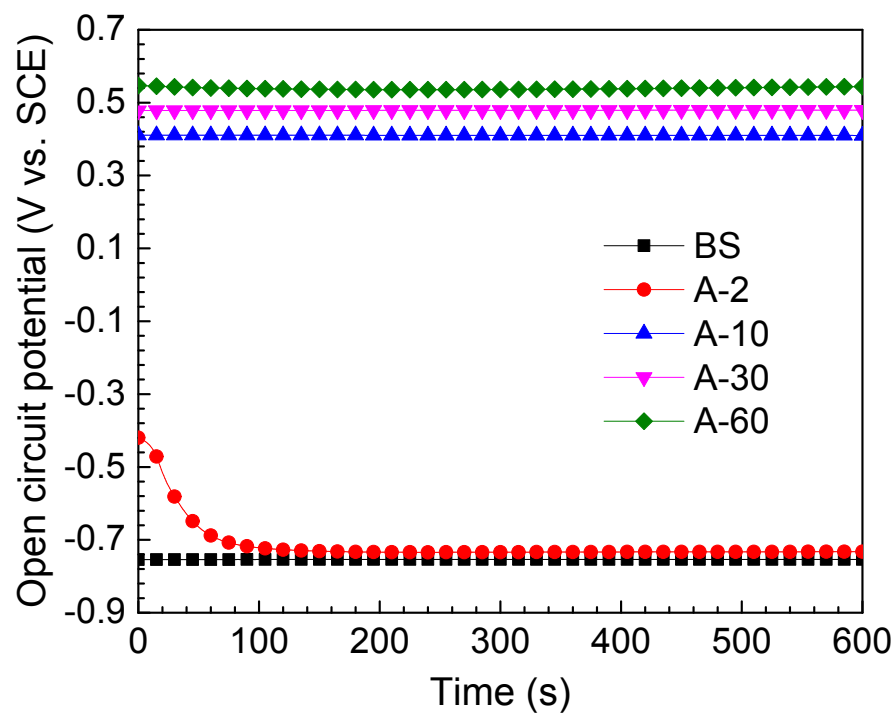

Fig. S3 Evolution of open-circuit potential (OCP) of BS and the anodized samples (A-2, A-10, A-30 and A-60) in PBS solution as a function of time.

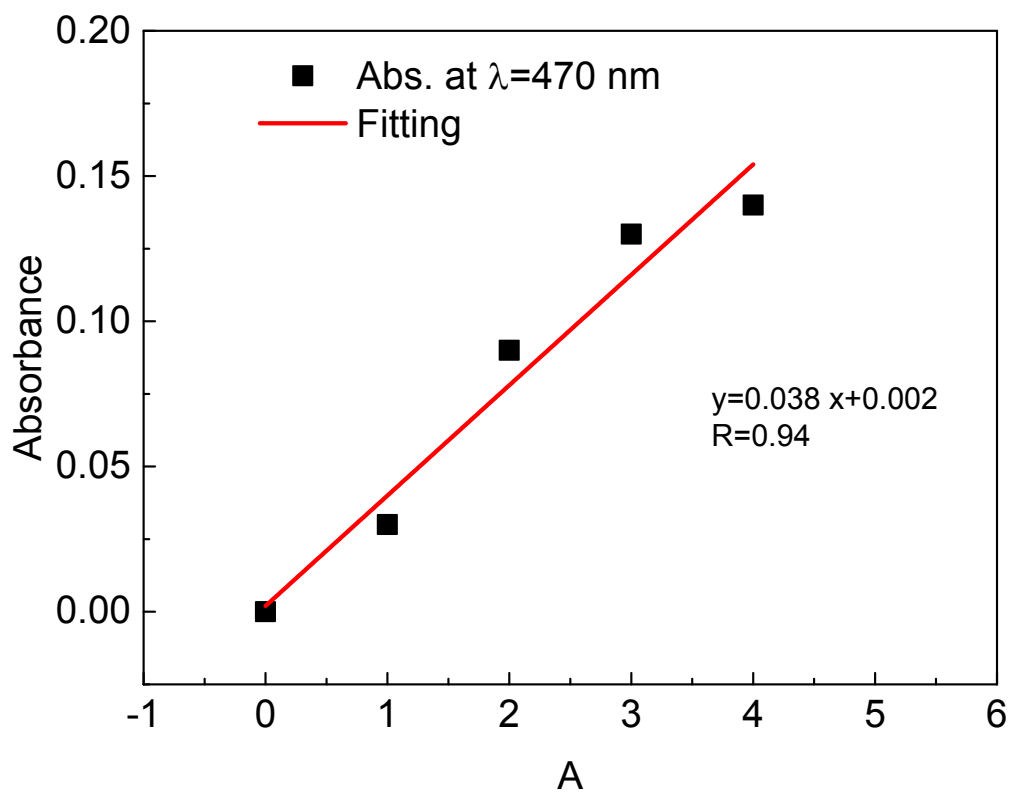

Fig. S4 The absorbance intensity ( $\lambda = 470$  nm) of resulted XTT-formazan in *pseudomonas aeruginosa* LB culture adding 100  $\mu$ M XTT as a function of time. The estimated yield rate of  $O_2^-$  is about 3.74  $\mu$ M/h.
